# Supplementary material
Source: ML conference proceedings conference paper supplement (https://openreview.net/forum?id=CpHHm-HUsa)
Supplement: supplementary_material [file attachment]

---

# Deep Non-Parametric Time Series Forecaster

---

Anonymous Author(s)

Affiliation

Address

email

## Abstract

1 This paper presents non-parametric baseline models for time series forecasting.  
2 Unlike classical forecasting models, the proposed approach does not assume any  
3 parametric form for the predictive distribution and instead generates predictions  
4 by sampling from the empirical distribution according to a *tunable* strategy. By  
5 virtue of this, the model is always able to produce reasonable forecasts (i.e., pre-  
6 dictions within the observed data range) without fail unlike classical models that  
7 suffer from numerical stability on some data distributions. Moreover, we develop  
8 a global version of the proposed method that automatically learns the sampling  
9 strategy by exploiting the information across multiple related time series. The  
10 empirical evaluation shows that the proposed methods have reasonable and con-  
11 sistent performance across all datasets, proving them to be strong baselines to be  
12 considered in one's forecasting toolbox.

## 13 1 Introduction

14 Non-parametric models (or algorithms) are quite popular in machine learning for both supervised  
15 and unsupervised learning tasks especially in applied scenarios.<sup>1</sup> Examples of non-parametric mod-  
16 els widely used in supervised learning [34] include classical  $k$ -nearest neighbours algorithm as well  
17 as more sophisticated tree-based methods like LightGBM and XGBoost [20, 7]. In contrast to para-  
18 metric models which have a finite set of tunable parameters that do not grow with the sample size,  
19 non-parametric algorithms produce models that can become more and more complex with an in-  
20 creasing amount of data; e.g., decision surface learned by  $k$ -nearest neighbours and decision trees.  
21 One of the main advantages of non-parametric models is that they work on any dataset, produce  
22 reasonable baseline results and aid in developing more advanced models.

23 Despite the popularity of non-parametric methods in a general supervised setting, perhaps surpris-  
24 ingly, not much work is done in developing non-parametric methods in time series forecasting.  
25 Perretti et al. [31] show in a specific application setting that non-parametric methods can outper-  
26 form parametric models in the presence of noise and advocate for more flexible non-parametric  
27 approaches. However, much of the work in time series forecasting has focussed on developing para-  
28 metric models that typically assume Gaussianity of the data, e.g., ETS and ARIMA [15]. Some  
29 extensions of classical models have been proposed to handle intermittent data [8], count data [41],  
30 non-negative data [1] as well as more general non-Gaussian settings [39, 9]. However, most of these  
31 models cannot reliably work for all data distributions without running into numerical issues, which  
32 severely inhibits their usefulness in large-scale production settings. At the least, a robust, fail-safe  
33 model must be available to provide fall-back [6].

34 This paper attempts to bridge this gap in the literature by presenting non-parametric models for  
35 the forecasting problem that can reliably be used for any data distributions and generate reasonable  
36 probabilistic forecasts. For this, we first introduce a simple, *local* version of the proposed method

---

<sup>1</sup>See for example <https://www.kaggle.com/kaggle-survey-2020>.

37 called Non-Parametric Time Series Forecaster (NPTS, for short). The main idea here is to sample  
 38 one of the time indices from the recent *context window* and use the value observed at that time  
 39 index as the prediction for the next time step.<sup>2</sup> The sampling procedure is repeated to generate  
 40 Monte Carlo samples of the predictive distribution, which is the standard way to represent forecast  
 41 distribution [15]. We present different sampling strategies based on seasonality of the data. This way,  
 42 the model can capture seasonality and its predictions are always within the observed data range and  
 43 do not require any *overrides* in a production setting to filter out bad or outlier forecasts. Since, the  
 44 strategy of sampling only from the past observations cannot capture trend, one can use the standard  
 45 preprocessing techniques such as differencing (see e.g., [16]) to de-trend the data before applying  
 46 NPTS. Since our standard benchmark data sets do not exhibit such a behaviour, we do not use this  
 47 technique in our experiments.

48 We then develop a global extension of the method called Deep NPTS, where the sampling strategy  
 49 is automatically learned from multiple related time series. For this we rely on a simple feed-forward  
 50 neural network that takes in past data of all time series along with (optional) time series co-variables  
 51 and outputs the sampling probabilities for the time indices. To train the model, we use a loss function  
 52 based on the ranked probability score [11], which is a discrete version of the continuous ranked  
 53 probability score (CRPS) [26]. Note that both RPS and CRPS are proper scoring rules for evaluating  
 54 how likely the value observed is in fact generated from the given distribution [11, 14]. Once the  
 55 model is trained, the sampling probabilities and then the predictions can be obtained by doing a  
 56 forward pass on the feed-forward neural network, which does not result in any numerical problems.  
 57 In spite of being a deep-learning based model, Deep NPTS produces output that is explainable  
 58 (Figure 1). Moreover, it generates calibrated forecasts (Figure 2) and for non-Gaussian settings like  
 59 integer data or rate/interval data, NPTS in general and DeepNPTS in particular give much better  
 60 results than the standard baselines, suggesting that our methods are good baselines to consider.

61 The article is structured as follows. We introduce the local model, NPTS, in Section 2 and then  
 62 extend it to a global version in Section 3. After discussing related work in Section 4, we provide  
 63 both qualitative and extensive quantitative experiments in Section 5. We conclude in Section 6.

## 64 2 Non-Parametric Time Series Forecaster

65 Here we introduce the non-parametric forecasting method for a single univariate time series. This  
 66 method is *local* in the sense that it will be applied to each time series independently, similar to the  
 67 classical models like ETS and ARIMA. In Section 3 we discuss a global version, which is more  
 68 relevant to modern time series panels.

69 Let  $z_{0:T-1} = (z_0, z_1, \dots, z_{T-1})$  be a given univariate time series. The time series  $z$  is univariate  
 70 if each  $z_i$  is a one-dimensional value. Note that we do not need to further specify the domain  
 71 of the time series (e.g., whether  $z \in \mathbb{R}^T$  or  $z \in \mathbb{Z}^T$ ) as this is not important unlike for other  
 72 methods. To generate prediction for the next time step  $T$ , NPTS randomly samples a time index  
 73  $t \in \{0, \dots, T-1\}$  from the past observed time range and use the value observed at that time index  
 74 as the prediction. That is,

$$\hat{z}_T = z_t, \quad t \sim p_T(\cdot), \quad t \in \{0, \dots, T-1\},$$

75 where  $p_T(\cdot)$  is a categorical distribution with  $T$  states. To generate distribution forecast, we sample  
 76 time indices from  $p_T(\cdot)$   $K$  times and store the corresponding observations as Monte Carlo samples  
 77 of the predictive distribution.

78 Note that this is quite different from naive forecasting methods that choose a fixed time index to  
 79 generate prediction, e.g.,  $T-1$  or  $T-\tau$ , where  $\tau$  represents seasonal period. The sampling of time  
 80 indices instead of choosing a fixed index from the past immediately brings up two advantages:

- 81 • it makes the forecaster probabilistic and consequently allows one to generate prediction  
 82 intervals,
- 83 • it gives the flexibility by leaving open the choice of sampling distribution  $p_T$ ; one can  
 84 define  $p_T$  based on prior knowledge (e.g., seasonality) or in more generally learn it from  
 85 the data.

---

<sup>2</sup>This is similar in spirit to  $k$ -nearest neighbours algorithm but unlike that method, our approach naturally generates a probabilistic output.

86 We now discuss some choices of sampling distribution  $p_T(\cdot)$  that give rise to various specializations  
 87 of NPTS. In Section 3 we discuss how to learn the sampling distribution.

88 One natural idea for the sampling distribution is to weigh each time index of the past according  
 89 to its “distance” from the time step where the forecast is needed. An obvious choice is to use the  
 90 exponentially decaying weights as the recent past is more indicative of what is going to happen in  
 91 the next step. This results in what we call NPTS (without any further qualifications):

$$p_T(t) \propto \exp(-\alpha |T - t|),$$

92 where  $\alpha$  is a hyper-parameter that will be tuned based on the data. We also refer to this variant as  
 93 NPTS with exponential kernel.

94 **Seasonal NPTS:** One can generalize the notion of distance from simple time indices to time-based  
 95 features  $f(t) \in \mathbb{R}^D$ , e.g., hour-of-day, day-of-week. This results in what we call seasonal NPTS

$$p_T(t) \propto \exp(-\alpha |f(T) - f(t)|).$$

96 The feature map  $f$  can in principle be learned as well from the data. In this case, one keeps the  
 97 exponential kernel intact but only learns the feature map. The method presented in the next section  
 98 directly learns  $p_T$ .

99 **NPTS with uniform kernel (Climatological Forecaster):** The special case, where one uses uni-  
 100 form weights for all the time steps in the context window, i.e.,  $p_T(t) = 1/T$ , leads to Climatological  
 101 forecaster [14]. One can similarly define a seasonal variant by placing uniform weights only on past  
 102 seasons indicated by the feature map. Again, this is different from the seasonal naive method [16],  
 103 which uses the observation from the latest season alone as the prediction whereas the former uni-  
 104 formly samples from several seasons to generate prediction.

105 **Extension to Multi-Horizon Forecast:** Note that so far we only talked about generating one step  
 106 ahead forecast. To generate forecasts for multiple time steps one simply absorbs the predictions for  
 107 last time steps into the observed targets and then generates consequent predictions using the last  $T$   
 108 targets. More precisely, let  $\{\hat{z}_{T,k}\}_{k=1}^K$  be the prediction samples obtained for the time step  $T$ . Then  
 109 prediction samples for time steps  $T + t$ ,  $t > 0$  are generated auto-regressively using the values  
 110  $(z_t, \dots, z_{T-1}, \hat{z}_{T,k}, \dots, \hat{z}_{T+t-1,k}), k = 1, 2, \dots, K$ .

### 111 3 Deep Non-Parametric Time Series Forecaster

112 The main idea of Deep NPTS model is to learn the sampling distribution from the data itself and con-  
 113 tinue to sample only from the observed values. Let  $N$  be a set of univariate time series  $\{z_{0:T_i-1}^{(i)}\}_{i=1}^N$ ,  
 114 where  $z_{1:T_i-1}^{(i)} = (z_1^{(i)}, z_2^{(i)}, \dots, z_{T_i-1}^{(i)})$  and  $z_t^{(i)}$  is a scalar quantity denoting the value of the  $i$ -th  
 115 time series at time  $t$  (or the time series of *item*  $i$ ).<sup>3</sup> Further, let  $\{\mathbf{x}_{0:T_i}^{(i)}\}_{i=1}^N$  be a set of associated,  
 116 time-varying covariate vectors with  $\mathbf{x}_t^{(i)} \in \mathbb{R}^D$ . We can assume time-varying covariate vectors to  
 117 be the only type of co-variates without loss of generality, as time-independent and item-specific fea-  
 118 tures can be incorporated into  $\mathbf{x}^{(i)}$  by repeating the feature value over all time points. Our goal is to  
 119 learn the sampling distribution  $p_{T_i}^{(i)}(t)$ ,  $t = 0, \dots, T_i - 1$  w.r.t. to the forecast start time  $T_i$  for each  
 120 time series. The prediction for time step  $T_i$  for the  $i^{th}$  time series is then obtained by sampling  $p_{T_i}^{(i)}$ .

#### 121 3.1 Model

122 Here we propose to use a feed-forward neural network to learn the sampling probabilities. As  
 123 inputs to this global model, we define a fixed length *context window* of size  $T$  spanning the last  
 124  $T$  observations  $z_{T_i-1:T_i-T}^{(i)}$ . In the following, without loss of generality, we refer to this context  
 125 window as the interval  $[0, T - 1]$  and the prediction time step as  $T$ ; however, note that the actual  
 126 time indices corresponding to this context window would be different for different time series.

<sup>3</sup>We consider time series where the the time points are equally spaced, but the units or frequencies are arbitrary (e.g. hours, days, months). Further, the time series do not have to be aligned, i.e., the starting point  $t = 1$  can refer to a different absolute time point for different time series  $i$ .

127 For each time series  $i$ , given the observations from the context window, the network outputs the  
 128 sampling probabilities to be used for prediction for time step  $T$ . More precisely,

$$p_T^{(i)}(t) = \Psi(\mathbf{x}_{0:T}^{(i)}, z_{0:T-1}^{(i)}; \phi), \quad t = 0, 1, \dots, T-1. \quad (1)$$

129 Here  $\Psi$  the neural network and  $\phi$  is the set of neural network weights that are shared among all  
 130 the time series. Note that for each time series  $i$ , the network outputs potentially different sampling  
 131 probabilities if time series features differ among the time series. However, these different sampling  
 132 probabilities are parametrized by a single set of common parameters  $\phi$ , facilitating information  
 133 sharing and global learning from multiple time series.

134 We assume from here onwards that the outputs of the network are normalized so that  $p_T^{(i)}(t)$  represent  
 135 probabilities. This can be achieved by using the softmax activation function for the final layer or  
 136 using the standard normalization (i.e., dividing each output by the sum of the outputs). It turned  
 137 out that either of the two normalizations do not consistently give the best possible results for all the  
 138 datasets. Hence we treat this as a hyper-parameter in our experiments.

### 139 3.2 Training

140 We now describe the training procedure for our model defined in Eq. 1, in particular by defining an  
 141 appropriate loss function. For ease of exposition and without loss of generality, we drop the index  $i$   
 142 in this section. Our prediction  $\hat{z}_T$  for a given univariate time series  $(z_0, z_1, \dots, z_{T-1})$  at time step  
 143  $T$  is generated by sampling from  $p_T$ . So our forecast distribution for time step  $T$  can be seen as  
 144 sampling from the discrete random variable  $\hat{Z}_T$  with the probability mass function given by

$$f_{\hat{Z}_T}(z_t) = \sum_{t': z_{t'}=z_t} p_T(t'), \quad t = 0, \dots, T-1. \quad (2)$$

145 That is, the prediction is always one of  $z_t, t = 0, \dots, T-1$  and the probability of predicting  $z_t$  is the  
 146 sum of the sampling probabilities of those time indices where the value  $z_t$  is observed. Similarly,  
 147 the cumulative distribution function for any value  $z$  is given by

$$F_{\hat{Z}_T}(z) = \sum_{t: z_t \leq z} p_T(t). \quad (3)$$

148 **Loss: Ranked Probability Score.** Given that our forecasts are generated by sampling from the dis-  
 149 crete random variable  $\hat{Z}_T$ , we propose to use the ranked probability score between our probabilistic  
 150 prediction (specified by  $F_{\hat{Z}_T}$ ) and the actual observation  $z_T$ ,

$$\text{RPS}(F_{\hat{Z}_T}, z_T) = \sum_{z_t \in \{z_0, \dots, z_{T-1}\}} \Lambda_{\alpha_t}(z_t, z_T), \quad (4)$$

151 where  $\alpha_t = F_{\hat{Z}_T}(z_t)$  is the quantile level of  $z_t$  and  $\Lambda_{\alpha}(q, z)$  is the quantile loss given by

$$\Lambda_{\alpha}(q, z) = (\alpha - \mathcal{I}_{[z < q]})(z - q).$$

152 Note that the summation in the loss Eq. 4 runs only on the distinct values of the past observations  
 153 given by the set  $\{z_0, \dots, z_{T-1}\}$ . The total loss of the network with parameters  $\phi$  over all the training  
 154 examples  $\{z_{0:T}^{(i)}\}$  can then be defined as

$$\mathcal{L}(\phi) = \sum_{i=1}^N \text{RPS}(F_{\hat{Z}_T^{(i)}}, z_T^{(i)}) \quad (5)$$

155 **Data Augmentation:** Note that the loss defined in Eq. 5 uses only a single time step  $T$  to evaluate  
 156 the prediction, for each training example. Since the same model would be used for multi-step  
 157 ahead prediction, we generate multiple training instances from each time series by selecting context  
 158 windows with different starting time points, similar to [38]. For example, assume that the training  
 159 data is available from February 01 to February 21 of a daily time series and we are required to  
 160 predict for 7 days. We can define the context window to be of size, say, 14 and generate 7 training  
 161 examples with the following sliding context windows: February  $1+k : 14+k, k = 0, 1, \dots, 6$ . For  
 162 each of these seven context windows (which are passed to the network as inputs), the training loss is  
 163 computed using the observations at February  $15+k, k = 0, 1, \dots, 6$  respectively. We do the same  
 164 for all the time series in the dataset.

### 165 3.3 Prediction

166 Once the model is trained, it can generate forecast distribution for a single time step. The multi-step  
167 ahead forecast can then be generated as described in the previous section using the same trained  
168 model. Note that to generate multi-horizon forecasts one needs to have access to time series feature  
169 values for the future time steps, a typical assumption of global models in time series forecasting [38,  
170 33].

## 171 4 Related Work

172 A number of new time series forecasting methods have been proposed over the last years, in partic-  
173 ular global deep learning methods (e.g., [29, 38, 23, 30, 36]). Benidis et al. [4] provides a recent  
174 overview. The usage of global models [19] in forecasting has well-known predecessors (e.g., [13]  
175 and [44] for a modern incarnation), however local models have traditionally dominated forecast-  
176 ing which have advantages given their parsimonious parametrization, interpretability and stemming  
177 from the fact that many time series forecasting problems consists of few time series. The surge of  
178 global models in the literature can be explained both by their theoretical superiority [28] as well  
179 as empirical success in independent competitions [25, 5]. We believe that both, local and global  
180 methods will continue to have their place in forecasting and its practical application. For example,  
181 the need for fail-safe fall-back models in real-world production use-cases has been recognized [6].  
182 Therefore, the methods presented here have both local and global versions.

183 While many methods of the afore-mentioned recent global deep learning methods only consider  
184 providing point forecasts, some do provide probabilistic forecasts [45, 38, 33] motivated by down-  
185 stream decision making problems often requiring the minimization of expected cost (e.g., [40]).  
186 The approaches to produce probabilistic forecast range from making standard parametric assump-  
187 tions on the pdf (e.g., [38, 32]), to more flexible parametrizations via copulas [37] or normalizing  
188 flows [35, 9], sometimes using extensions to energy-based models [36], from quantile regres-  
189 sion [45] to parametrization of the quantile function [12]. All these approaches share an inherent risk  
190 induced by potential numerical instability. For example, even estimating a standard likelihood of a  
191 linear dynamical system via a Kalman Filter (see [33] for a recent forecasting example) easily results  
192 in numerical complications unless care is taken. In contrast, the proposed methods here are almost  
193 completely fail-safe in the sense that numerical issues will not result in catastrophically wrong fore-  
194 casts. While the added robustness comes at the price of some accuracy loss, the overall accuracy is  
195 nevertheless competitive and an additional benefit is the reduced amount of hyperparameter tuning  
196 necessary, even for Deep NPTS.

197 The general idea of constructing predictive distributions from the empirical distributions of (subsets  
198 of) observations has been explored in the context of probabilistic regression, e.g. in the form of  
199 Quantile Regression Forests [27] or more generally in the form of conformal prediction [43].

## 200 5 Experiments

201 We present empirical evaluation of the proposed method on the following datasets, which are pub-  
202 licly available in `GLuonTS` time series library [2].

- 203 • Electricity: hourly time series of the electricity consumption of 370 customers [10]
- 204 • Exchange rate: daily exchange rate between 8 currencies as used in [21]
- 205 • Solar: hourly photo-voltaic production of 137 stations in Alabama State used in [21]
- 206 • Taxi: spatio-temporal traffic time series of New York taxi rides [42] taken at 1214 locations  
207 every 30 minutes in the months of January 2015 (training set) and January 2016 (test set)
- 208 • Traffic: hourly occupancy rate of 963 San Francisco car lanes [10]
- 209 • Wikipedia: daily page views of 9535 Wikipedia pages used in [12]
- 210 • M4: datasets, of varying frequencies from hourly to yearly, used in the M4 competition [25]

211 Table 1 summarizes the key features of these datasets. For M4 datasets there is a single multi-  
212 horizon prediction window where the forecasts are evaluated. For other datasets, the predictions are  
213 evaluated in a rolling-window fashion. The length of the prediction window as well as the number

| dataset       | No. Test Points<br>Pred. Len. $\times$ No. Windows | Domain         | Freq.     | Size  | (Median) TS Len. |
|---------------|----------------------------------------------------|----------------|-----------|-------|------------------|
| Exchange Rate | 150 (30 $\times$ 5)                                | $\mathbb{R}^+$ | daily     | 8     | 6071             |
| Solar Energy  | 168 (24 $\times$ 7)                                | $\mathbb{R}^+$ | hourly    | 137   | 7009             |
| Electricity   | 168 (24 $\times$ 7)                                | $\mathbb{R}^+$ | hourly    | 370   | 5790             |
| Traffic       | 168 (24 $\times$ 7)                                | $[0, 1]$       | hourly    | 963   | 10413            |
| Taxi          | 1344 (24 $\times$ 56)                              | $\mathbb{N}$   | 30-min    | 1214  | 1488             |
| Wiki          | 150 (30 $\times$ 5)                                | $\mathbb{N}$   | daily     | 2000  | 792              |
| M4 hourly     | 48 $\times$ 1                                      | $\mathbb{R}^+$ | hourly    | 414   | 960              |
| M4 daily      | 14 $\times$ 1                                      | $\mathbb{R}^+$ | daily     | 4227  | 2940             |
| M4 weekly     | 13 $\times$ 1                                      | $\mathbb{R}^+$ | weekly    | 359   | 934              |
| M4 monthly    | 18 $\times$ 1                                      | $\mathbb{R}^+$ | monthly   | 48000 | 202              |
| M4 quarterly  | 8 $\times$ 1                                       | $\mathbb{R}^+$ | quarterly | 24000 | 88               |
| M4 yearly     | 6 $\times$ 1                                       | $\mathbb{R}^+$ | yearly    | 23000 | 29               |

Table 1: Summary of the datasets used in the evaluations: Number of time ssteps evaluated, data domain, frequency of observations, number of time series in the dataset, and median length of time series.

of such windows are given in Table 1. Note that for each time series in a dataset, forecasts are evaluated at a total of  $\tau$  time points, where  $\tau$  is length of the prediction window times the number of windows. For  $\tau$ , the total evaluation length, let  $T + \tau$  be the length of the time series available for a dataset. Then each method initially receives time series for the first  $T$  time steps which are used to tune hyperparameters in a back-test fashion, e.g., training on the first  $T - \tau$  steps and validating on the last  $\tau$  time steps. Once the best hyperparameters are found, each model is once again trained on  $T$  time steps and is evaluated on the time steps from  $T + 1$  to  $T + \tau$ .

**Evaluation Criteria:** For evaluating the forecast distribution, we use the mean of quantile losses evaluated at different quantiles implemented in `GLuonTS`, with the quantile levels ranging from 0.5 to 0.95 in steps of 0.05. Note that this is an approximate version of the continuously ranked probability score (CRPS), a proper metric for evaluating predictive distributions. Additionally, to evaluate mean forecasts, we use the (normalized) root-mean squared error (RMSE), which is an evaluation metric for point forecasts.

227

| Parameter     | Range                 | Parameter        | Range                        |
|---------------|-----------------------|------------------|------------------------------|
| dropout       | {0, 0.1}              | dropout          | {0, 0.1}                     |
| static feat   | True   Flase          | static feat      | True   Flase                 |
| normalization | softmax, normal       | num of RNN cells | {40, 80}                     |
| input scaling | None, standardization | context length   | {1, 2} $\times$ pred. length |
| loss scaling  | None, min/max scaling | epochs           | {200, 300}                   |
| epochs        | {200, 300}            |                  |                              |

Table 2: Hyperparameter grid for DeepNPTS.

Table 3: Hyperparameter grid for DeepAR.

**Methods Compared:** We compare against the standard baselines in forecasting literature including Seasonal-Naive, ETS, ARIMA [16] as well as DeepAR [38], a deep-learning based forecasting model that has shown to be one of the best performing models empirically [2]<sup>4</sup>. We also include for comparison all the variants of the proposed NPTS method. In particular, we have the following four combinations: (i) NPTS with or without seasonality (ii) NPTS using uniform weights or exponentially decaying weights. For the variants of NPTS that use exponential kernel (NPTS, Seas.NPTS) we tune the (inverse of) width parameter  $\alpha$  on the validation set. In particular, we use the grid:  $\alpha \in \{1.0, 0.75, 0.5, 0.25, 0.1\}$ . For the other two variants using the uniform kernel (NPTS(uni.), Seas.NPTS(uni.)), there are no hyperparameters to be tuned. For the DeepNPTS model the hyperparameter grid is given in Table 2. The number of layers of the MLP is fixed at 2 and the number of hidden nodes (equal to the size of the context window, see Section 3.1) is chosen as a constant multiple of the prediction length. This multiple varies for each dataset (depending on the length of the

<sup>4</sup>Results for more baselines are given in the supplementary material.

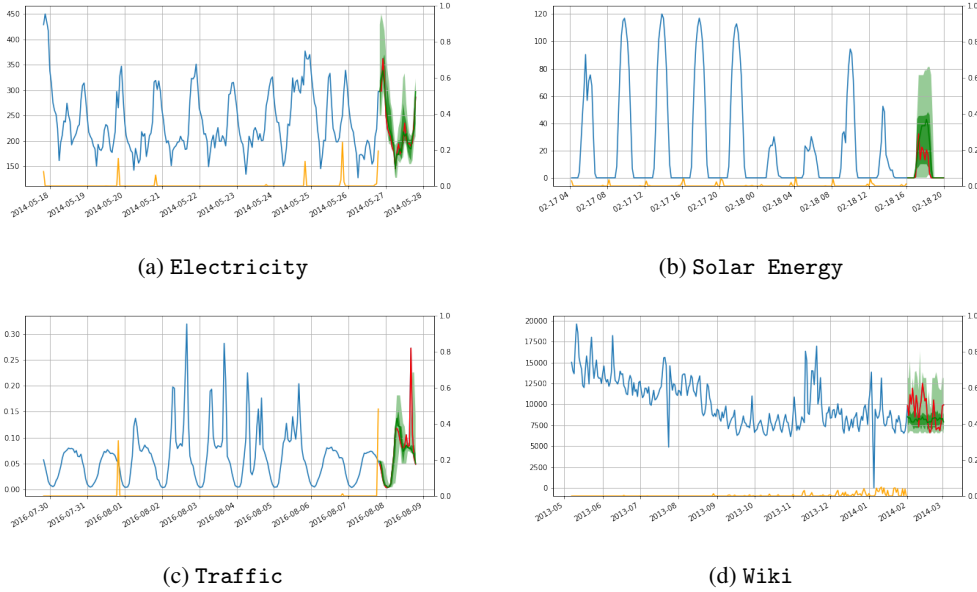

Figure 1: Example of forecasts obtained with DeepNPTS on some of the datasets used for experiments, together with the probabilities that the model outputs. The dark green line is the median forecast, surrounded by the 50% (green) and 90% (light green) prediction intervals. The red line is the actual target in the forecast time window. The orange line indicates the probability assigned by the model to the corresponding time point (as measured on the dual axis on the right of each plot), in making the *first* time step prediction: this highlights the seasonal patterns that the model finds in the data.

240 time series available) and is fixed at a large value, without tuning, so that multiple training instances  
 241 (equal to the prediction length) can be generated for each time series in the dataset as discussed in  
 242 Section 3.1. We give the exact lengths of the context windows used for each dataset in the supple-  
 243 mentary material. Similarly Table 3 shows the hyperparameter grid for the DeepAR method. The  
 244 other hyper-parameters of DeepAR are fixed at the default values [2]. Both DeepAR and DeepNPTS  
 245 receive time features that are automatically determined based on the frequency of the given dataset  
 246 as implemented in `GLuonTS` [2]. For ETS and ARIMA, we use the auto-tuning option provided by the  
 247 R forecast package [18]. We use the mean quantile loss as the criteria for tuning the models, since  
 248 all models compared here produce distribution forecasts.

249 **Qualitative Analysis:** Before presenting quantitative results, we first analyse the performance  
 250 DeepNPTS model qualitatively by visualizing its forecasts as well as the probabilities it learned, by  
 251 considering specific time series in detail (instead of overall aggregate accuracy metrics). Figure 1  
 252 shows forecasts of DeepNPTS for one example time series taken from each of the four of the datasets  
 253 used in the experiments. Each plot shows the true target as well as the 50% and 90% prediction  
 254 intervals of the forecast distribution for the prediction window. Additionally, we show the output  
 255 of the model (i.e., sampling probabilities) with an orange line (note the dual axes on the right side  
 256 of each plot). Note that this is the output of the model in making the prediction for the *first* time  
 257 step of the prediction window. In the case of `Traffic`, one can notice that the last observation and  
 258 the same hour on the previous week received the highest probabilities, indicating that the model  
 259 correctly captures the hour-of-week seasonality pattern. For `Electricity`, the same hour over  
 260 multiple consecutive days was assigned high probability, indicating a hour-of-day seasonality. For  
 261 non-seasonal time series like `Wiki` the most recent time points are assigned higher probabilities.

262 One of the main benefits of DeepNPTS is then the *explainability* of its output: although it is a deep-  
 263 learning based model, one can easily explain how the model generated forecasts by looking at which  
 264 time points got higher probabilities, for any given time step, and also verify if the model assigned  
 265 probabilities as intended.

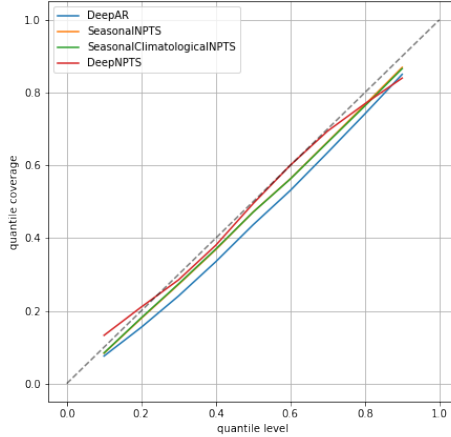

Figure 2: Calibration plot for the Traffic dataset: this shows what fraction of the actual data lies below the predicted quantiles, and is a crucial quality metric for probabilistic forecasts (the ideal profile lies on the diagonal). On this example, the predictions from DeepNPTS appear to be better calibrated than the ones from Seas . NPTS and Seas . NPTS (uni . ), which are in turn better calibrated than the ones from DeepAR.

| dataset estimator   | Electricity          | Exchange Rate        | Solar Energy         | Taxi                 | Traffic              | Wiki                 |
|---------------------|----------------------|----------------------|----------------------|----------------------|----------------------|----------------------|
| Seas . Naive        | 0.070+/-0.000        | 0.011+/-0.000        | 0.605+/-0.000        | 0.507+/-0.000        | 0.251+/-0.000        | 0.404+/-0.000        |
| AutoETS             | 0.118+/-0.001        | <b>0.007+/-0.000</b> | 1.717+/-0.005        | 0.572+/-0.000        | 0.359+/-0.000        | 0.664+/-0.001        |
| AutoARIMA           | -                    | <b>0.008+/-0.000</b> | 1.161+/-0.001        | 0.473+/-0.000        | -                    | 0.477+/-0.000        |
| DeepAR              | <b>0.056+/-0.001</b> | 0.009+/-0.001        | <b>0.426+/-0.004</b> | <b>0.289+/-0.001</b> | <b>0.117+/-0.001</b> | <b>0.226+/-0.002</b> |
| NPTS (uni .)        | 0.230+/-0.001        | 0.026+/-0.000        | 0.805+/-0.001        | 0.473+/-0.000        | 0.403+/-0.000        | 0.291+/-0.000        |
| Seas . NPTS (uni .) | 0.061+/-0.000        | 0.026+/-0.000        | 0.791+/-0.000        | 0.474+/-0.000        | 0.174+/-0.000        | 0.285+/-0.000        |
| NPTS                | 0.230+/-0.001        | 0.021+/-0.000        | 0.802+/-0.001        | 0.473+/-0.000        | 0.403+/-0.000        | 0.277+/-0.000        |
| Seas . NPTS         | 0.060+/-0.000        | 0.020+/-0.000        | 0.790+/-0.000        | 0.474+/-0.000        | 0.173+/-0.000        | 0.269+/-0.000        |
| DeepNPTS            | <b>0.059+/-0.004</b> | 0.009+/-0.000        | <b>0.447+/-0.011</b> | <b>0.413+/-0.015</b> | <b>0.163+/-0.036</b> | <b>0.232+/-0.000</b> |

Table 4: Mean quantile losses averaged over 5 runs (lower is better). Best two methods are highlighted. The bottom half shows different variants of the NPTS method. AutoARIMA exceeded the time limit of 24 hours for Electricity and Traffic data sets, so we do not report their numbers.

266 Next, we analyse how calibrated are the forecasts of the DeepNPTS model. Figure 2 shows calibration  
 267 plot for the Traffic dataset. Calibration plot shows what fraction of the actual data lies  
 268 below the predicted quantiles, with the ideal profile being the diagonal line. It is a crucial quality  
 269 metric for probabilistic forecasts. As expected, forecasts from both the NPTS and DeepNPTS models  
 270 are highly calibrated in absolute terms and in relative terms, more so than DeepAR with a student-t  
 271 output distribution.

| dataset             | M4 daily             | M4 hourly            | M4 monthly           | M4 quarterly         | M4 weekly            | M4 yearly            |
|---------------------|----------------------|----------------------|----------------------|----------------------|----------------------|----------------------|
| Seas . Naive        | 0.028+/-0.000        | 0.048+/-0.000        | 0.146+/-0.000        | 0.119+/-0.000        | 0.063+/-0.000        | 0.162+/-0.000        |
| AutoETS             | <b>0.022+/-0.000</b> | <b>0.042+/-0.001</b> | <b>0.096+/-0.000</b> | <b>0.076+/-0.000</b> | <b>0.049+/-0.000</b> | <b>0.122+/-0.000</b> |
| AutoARIMA           | 0.024+/-0.000        | <b>0.038+/-0.001</b> | <b>0.094+/-0.000</b> | <b>0.077+/-0.000</b> | <b>0.048+/-0.000</b> | <b>0.120+/-0.000</b> |
| DeepAR              | <b>0.022+/-0.000</b> | 0.050+/-0.003        | 0.112+/-0.002        | 0.086+/-0.004        | 0.051+/-0.004        | 0.130+/-0.007        |
| NPTS (uni .)        | 0.161+/-0.000        | 0.115+/-0.001        | 0.257+/-0.000        | 0.289+/-0.000        | 0.319+/-0.001        | 0.389+/-0.000        |
| Seas . NPTS (uni .) | 0.161+/-0.000        | 0.053+/-0.000        | 0.258+/-0.000        | 0.288+/-0.000        | 0.329+/-0.001        | 0.389+/-0.000        |
| NPTS                | 0.139+/-0.000        | 0.112+/-0.001        | 0.224+/-0.000        | 0.246+/-0.000        | 0.272+/-0.000        | 0.343+/-0.000        |
| Seas . NPTS         | 0.139+/-0.000        | 0.046+/-0.000        | 0.225+/-0.000        | 0.245+/-0.000        | 0.285+/-0.000        | 0.343+/-0.000        |
| DeepNPTS            | 0.027+/-0.000        | 0.065+/-0.019        | 0.149+/-0.012        | 0.097+/-0.002        | 0.057+/-0.001        | 0.168+/-0.008        |

Table 5: Mean quantile losses averaged over 5 runs (lower is better). Best two methods are highlighted. The bottom half shows different variants of the NPTS method.



272 **Quantitative Results:** Tables 4 and 5 summarize the quantitative results for the two groups of  
273 datasets considered via mean quantile losses, averaged over 5 runs. Top two best performing meth-  
274 ods are highlighted with **boldface**. In both tables, the top half shows the baselines considered and  
275 the bottom half shows different variants of the proposed NPTS method; more baseline results are  
276 in the supplement. First note that DeepNPTS model always (except for one case) achieves much  
277 better results than any other variant of NPTS showing that learning the sampling strategy clearly  
278 helps. Moreover, DeepNPTS comes as one of the top two methods in 5 out of 12 datasets consid-  
279 ered and in the remaining its results are close to the best performing method. Importantly for the  
280 *difficult* datasets like Solar Energy (non-negative data with several zeros), Traffic (data lies in  
281  $(0, 1)$ ) and Wiki (integer data), the gap between the performance of DeepNPTS and the standard  
282 baselines AutoETS and AutoARIMA is very high. Even some of the other variants of NPTS (with  
283 fixed sampling strategy) performed better than AutoETS and AutoARIMA in these datasets without  
284 any training (other than the tuning of  $\alpha$ ). All the variants of NPTS run much faster than the standard  
285 baselines AutoETS, AutoARIMA, which fit a different model to each time series in the dataset. These  
286 observations, in addition to explainability and being able to generate calibrated forecasts, further  
287 support our claim that the proposed methods in general and DeepNPTS in particular are good baselines  
288 to consider for any data distributions. In the supplement, we include additional results evaluating  
289 the mean (point) forecasts using the RMSE metric; the results trend is exactly the same.

## 290 6 Conclusion

291 In this paper we presented a novel probabilistic forecasting method, in both an extremely simple  
292 yet effective local version, and an adaptive, deep-learning-based global version. In both variants,  
293 the proposed methods can serve as robust, fail-safe forecasting methods that are able to provide  
294 accurate probabilistic forecasts. We achieve robustness by constructing the predictive distributions  
295 by reweighting the empirical distribution of the past observations, and achieve accuracy by taking  
296 advantage of learning the context-dependent weighting globally, across time series. We show in  
297 empirical evaluations that the methods, NPTS and Deep NPTS, perform roughly on-par with recent,  
298 state-of-the-art methods both quantitatively and qualitatively.

299 **Limitations:** One key limitation of the proposed approach is that it—like all methods that rely  
300 directly on the empirical distributions of the observations to construct predictive distributions—  
301 without additional processing cannot model non-stationary time series (e.g. containing trend). While  
302 techniques for achieving stationarity (like differencing and de-trending) are readily available, care  
303 must be taken when they are combined with our proposed approach to retain robustness. Addressing  
304 this limitation in a principled way is an interesting avenue for future work. Further, the predictive  
305 distributions do not have a compact parametric form (or even a density), precluding certain applica-  
306 tions (though both could be obtained post-hoc e.g. through a parametric fit or smoothing via kernel  
307 density estimation). Finally, a limitation of this work stems from its intention as a robust baseline  
308 method: we do not expect our method to enable a truly state-of-the-art accuracy without introducing  
309 additional elements that would violate one of the design principles such as robustness.

## 310 7 Broader Impact

311 The present article stems from the authors' work on time series forecasting in industrial settings.  
312 The proposed methods are applicable to forecasting and allow to re-use multiple time series panels.  
313 Business applications include supply chain optimization, sales prediction and energy forecasting.  
314 More accurate forecasts allow for better decision making which we hope will lead to benefits such  
315 as waste reduction, reduction of emission through improve transportation costs and optimisation of  
316 energy consumption.

317 **References**

- 318 [1] M. Akram, J. Hyndman, and K. Ord. Exponential smoothing and non-negative data. 51(4):  
319 415–432, 2009.
- 320 [2] A. Alexandrov, K. Benidis, M. Bohlke-Schneider, V. Flunkert, J. Gasthaus, T. Januschowski,  
321 D. C. Maddix, S. Rangapuram, D. Salinas, and J. Schulz. GluonTS: Probabilistic Time Series  
322 Models in Python. *Journal of Machine Learning Research*, 21(116):1–6, 2020.
- 323 [3] V. Assimakopoulos and K. Nikolopoulos. The theta model: a decomposition approach to  
324 forecasting. *International Journal of Forecasting*, 16(4):521–530, 2000.
- 325 [4] K. Benidis, S. S. Rangapuram, V. Flunkert, B. Wang, D. Maddix, C. Turkmen, J. Gasthaus,  
326 M. Bohlke-Schneider, D. Salinas, L. Stella, L. Callot, and T. Januschowski. Neural forecasting:  
327 Introduction and literature overview, 2020.
- 328 [5] C. S. Bojer and J. P. Meldgaard. Kaggle forecasting competitions: An overlooked learning  
329 opportunity. *International Journal of Forecasting*, 37(2):587–603, 2021. ISSN 0169-2070.
- 330 [6] J.-H. Böse, V. Flunkert, J. Gasthaus, T. Januschowski, D. Lange, D. Salinas, S. Schelter,  
331 M. Seeger, and Y. Wang. Probabilistic demand forecasting at scale. *Proceedings of the VLDB  
332 Endowment*, 10(12):1694–1705, 2017.
- 333 [7] T. Chen and C. Guestrin. XGBoost: A scalable tree boosting system. In *Proceedings of the  
334 22nd ACM SIGKDD International Conference on Knowledge Discovery and Data Mining*,  
335 KDD '16, pages 785–794. ACM, 2016.
- 336 [8] J. Croston. Forecasting and stock control for intermittent demands. *Journal of Operational  
337 Research Quarterly*, 23(3):289–303, 1972.
- 338 [9] E. de Bézenac, S. S. Rangapuram, K. Benidis, M. Bohlke-Schneider, R. Kurle, L. Stella,  
339 H. Hasson, P. Gallinari, and T. Januschowski. Normalizing kalman filters for multivariate  
340 time series analysis. In *Advances in Neural Information Processing Systems*, volume 33, pages  
341 2995–3007, 2020.
- 342 [10] D. Dheeru and E. Karra Taniskidou. UCI machine learning repository. [http://archive.  
343 ics.uci.edu/ml](http://archive.ics.uci.edu/ml), 2017.
- 344 [11] E. S. Epstein. A scoring system for probability forecasts of ranked categories. *J. Appl. Meteor.*,  
345 8:985–987, 1969.
- 346 [12] J. Gasthaus, K. Benidis, Y. Wang, S. S. Rangapuram, D. Salinas, V. Flunkert, and  
347 T. Januschowski. Probabilistic forecasting with spline quantile function RNNs. *AISTATS*,  
348 2019.
- 349 [13] J. Geweke. The dynamic factor analysis of economic time series. *Latent variables in socio-  
350 economic models*, 1977.
- 351 [14] T. Gneiting and A. E. Raftery. Strictly proper scoring rules, prediction, and estimation. *Journal  
352 of the American Statistical Association*, 102(477):359–378, 2007.
- 353 [15] R. Hyndman, A. Koehler, K. Ord, and R. Snyder. *Forecasting with exponential smoothing. The  
354 state space approach*. 2008. doi: 10.1007/978-3-540-71918-2.
- 355 [16] R. J. Hyndman and G. Athanasopoulos. Forecasting: Principles and practice. [www.otexts.  
356 org/fpp](http://www.otexts.org/fpp), 987507109, 2017.
- 357 [17] R. J. Hyndman and B. Billah. Unmasking the Theta method. *International Journal of Fore-  
358 casting*, 19(2):287–290, 2003.
- 359 [18] R. J. Hyndman and Y. Khandakar. Automatic time series forecasting: the forecast package for  
360 R. *Journal of Statistical Software*, 26(3):1–22, 2008. URL [https://www.jstatsoft.org/  
361 article/view/v027i03](https://www.jstatsoft.org/article/view/v027i03).

- 362 [19] T. Januschowski, J. Gasthaus, Y. Wang, D. Salinas, V. Flunkert, M. Bohlke-Schneider, and  
363 L. Callot. Criteria for classifying forecasting methods. *International Journal of Forecasting*,  
364 2019.
- 365 [20] G. Ke, Q. Meng, T. Finley, T. Wang, W. Chen, W. Ma, Q. Ye, and T.-Y. Liu. LightGBM:  
366 A highly efficient gradient boosting decision tree. In I. Guyon, U. V. Luxburg, S. Bengio,  
367 H. Wallach, R. Fergus, S. Vishwanathan, and R. Garnett, editors, *Advances in Neural Informa-*  
368 *tion Processing Systems*, volume 30. Curran Associates, Inc., 2017.
- 369 [21] G. Lai, W. Chang, Y. Yang, and H. Liu. Modeling long- and short-term temporal patterns with  
370 deep neural networks. *CoRR*, abs/1703.07015, 2017.
- 371 [22] E. Liberty, Z. Karnin, B. Xiang, L. Rouesnel, B. Coskun, R. Nallapati, J. Delgado,  
372 A. Sadoughi, Y. Astashonok, P. Das, C. Balioglu, S. Chakravarty, M. Jha, P. Gautier, D. Arpin,  
373 T. Januschowski, V. Flunkert, Y. Wang, J. Gasthaus, L. Stella, S. Rangapuram, D. Salinas,  
374 S. Schelter, and A. Smola. Elastic machine learning algorithms in amazon sagemaker. In  
375 *Proceedings of the 2020 ACM SIGMOD International Conference on Management of Data*,  
376 SIGMOD '20, page 731–737, New York, NY, USA, 2020. Association for Computing Ma-  
377 chinery. ISBN 9781450367356.
- 378 [23] B. Lim, S. O. Arik, N. Loeff, and T. Pfister. Temporal fusion transformers for interpretable  
379 multi-horizon time series forecasting, 2019.
- 380 [24] A. M. D. Livera, R. J. Hyndman, and R. D. Snyder. Forecasting time series with complex sea-  
381 sonal patterns using exponential smoothing. *Journal of the American Statistical Association*,  
382 106(496):1513–1527, 2011.
- 383 [25] S. Makridakis, E. Spiliotis, and V. Assimakopoulos. The M4 competition: Results, findings,  
384 conclusion and way forward. *International Journal of Forecasting*, 34(4):802–808, 2018.
- 385 [26] J. E. Matheson and R. L. Winkler. Scoring rules for continuous probability distributions. *Man-*  
386 *agement science*, 22(10):1087–1096, 1976.
- 387 [27] N. Meinshausen. Quantile regression forests. *Journal of Machine Learning Research*, 7(Jun):  
388 983–999, 2006.
- 389 [28] P. Montero-Manso and R. J. Hyndman. Principles and algorithms for forecasting groups of  
390 time series: Locality and globality. *International Journal of Forecasting*, 2021.
- 391 [29] B. N. Oreshkin, D. Carпов, N. Chapados, and Y. Bengio. N-beats: Neural basis expansion  
392 analysis for interpretable time series forecasting. *arXiv preprint arXiv:1905.10437*, 2019.
- 393 [30] B. N. Oreshkin, D. Carпов, N. Chapados, and Y. Bengio. Meta-learning framework with  
394 applications to zero-shot time-series forecasting. *arXiv preprint arXiv:2002.02887*, 2020.
- 395 [31] C. Perretti, G. Sugihara, and S. Munch. Forecasting and stock control for intermittent demands.  
396 *Ecology*, 94(4):794–800, 2013.
- 397 [32] S. Rabanser, T. Januschowski, V. Flunkert, D. Salinas, and J. Gasthaus. The effectiveness of  
398 discretization in forecasting: An empirical study on neural time series models. *arXiv preprint*  
399 *arXiv:2005.10111*, 2020.
- 400 [33] S. S. Rangapuram, M. W. Seeger, J. Gasthaus, L. Stella, Y. Wang, and T. Januschowski. Deep  
401 state space models for time series forecasting. In *Advances in Neural Information Processing*  
402 *Systems*, pages 7785–7794, 2018.
- 403 [34] S. Raschka. Machine learning FAQ. What is the difference between a parametric learning  
404 algorithm and a nonparametric learning algorithm? [https://sebastianraschka.com/](https://sebastianraschka.com/faq/docs/parametric_vs_nonparametric.html)  
405 [faq/docs/parametric\\_vs\\_nonparametric.html](https://sebastianraschka.com/faq/docs/parametric_vs_nonparametric.html).
- 406 [35] K. Rasul, A.-S. Sheikh, I. Schuster, U. Bergmann, and R. Vollgraf. Multi-variate probabilistic  
407 time series forecasting via conditioned normalizing flows. *arXiv preprint arXiv:2002.06103*,  
408 2020.

409 [36] K. Rasul, C. Seward, I. Schuster, and R. Vollgraf. Autoregressive denoising diffusion models  
410 for multivariate probabilistic time series forecasting. *arXiv preprint arXiv:2101.12072*, 2021.

411 [37] D. Salinas, M. Bohlke-Schneider, L. Callot, R. Medico, and J. Gasthaus. High-dimensional  
412 multivariate forecasting with low-rank gaussian copula processes. In *Advances in Neural In-*  
413 *formation Processing Systems 32*, 2019.

414 [38] D. Salinas, V. Flunkert, J. Gasthaus, and T. Januschowski. DeepAR: Probabilistic forecasting  
415 with autoregressive recurrent networks. *International Journal of Forecasting*, 2019.

416 [39] M. W. Seeger, D. Salinas, and V. Flunkert. Bayesian intermittent demand forecasting  
417 for large inventories. In D. Lee, M. Sugiyama, U. Luxburg, I. Guyon, and R. Gar-  
418 nett, editors, *Advances in Neural Information Processing Systems*, volume 29. Curran  
419 Associates, Inc., 2016. URL [https://proceedings.neurips.cc/paper/2016/file/](https://proceedings.neurips.cc/paper/2016/file/03255088ed63354a54e0e5ed957e9008-Paper.pdf)  
420 [03255088ed63354a54e0e5ed957e9008-Paper.pdf](https://proceedings.neurips.cc/paper/2016/file/03255088ed63354a54e0e5ed957e9008-Paper.pdf).

421 [40] D. Simchi-Levi and E. Simchi-Levi. We need a stress test for critical supply chains. *Harvard*  
422 *Business Review*, 2020.

423 [41] R. D. Snyder, J. K. Ord, and A. Beaumont. Forecasting the intermittent demand for slow-  
424 moving inventories: A modelling approach. *International Journal of Forecasting*, 28(2):485–  
425 496, 2012.

426 [42] N. Taxi and L. Commission. TLC trip record data. [https://www1.nyc.gov/site/tlc/](https://www1.nyc.gov/site/tlc/about/tlc-trip-record-data.page)  
427 [about/tlc-trip-record-data.page](https://www1.nyc.gov/site/tlc/about/tlc-trip-record-data.page), 2015.

428 [43] V. Vovk, A. Gammerman, and G. Shafer. *Algorithmic Learning in a Random World*. Springer-  
429 Verlag, Berlin, Heidelberg, 2005. ISBN 0387001522.

430 [44] Y. Wang, A. Smola, D. Maddix, J. Gasthaus, D. Foster, and T. Januschowski. Deep factors for  
431 forecasting. In *International Conference on Machine Learning*, pages 6607–6617, 2019.

432 [45] R. Wen, K. Torkkola, and B. Narayanaswamy. A multi-horizon quantile recurrent forecaster.  
433 *arXiv preprint arXiv:1711.11053*, 2017.

## 434 Checklist

- 435 1. For all authors...
- 436 (a) Do the main claims made in the abstract and introduction accurately reflect the paper’s  
437 contributions and scope? [Yes]
- 438 (b) Did you describe the limitations of your work? [Yes] See Section 6.
- 439 (c) Did you discuss any potential negative societal impacts of your work? [Yes] In Sec-  
440 tion 7.
- 441 (d) Have you read the ethics review guidelines and ensured that your paper conforms to  
442 them? [Yes]
- 443 2. If you are including theoretical results...
- 444 (a) Did you state the full set of assumptions of all theoretical results? [N/A]
- 445 (b) Did you include complete proofs of all theoretical results? [N/A]
- 446 3. If you ran experiments...
- 447 (a) Did you include the code, data, and instructions needed to reproduce the main experi-  
448 mental results (either in the supplemental material or as a URL)? [No] We will open  
449 source the code after acceptance, we included instruction to reproduce the results and  
450 we used datasets available online.
- 451 (b) Did you specify all the training details (e.g., data splits, hyperparameters, how they  
452 were chosen)? [Yes]
- 453 (c) Did you report error bars (e.g., with respect to the random seed after running experi-  
454 ments multiple times)? [Yes]

- 455 (d) Did you include the total amount of compute and the type of resources used (e.g., type  
456 of GPUs, internal cluster, or cloud provider)? See supplementary material. [Yes]  
457
4. If you are using existing assets (e.g., code, data, models) or curating/releasing new assets...  
458 (a) If your work uses existing assets, did you cite the creators? [Yes]  
459 (b) Did you mention the license of the assets? [Yes] See the supplementary material.  
460 (c) Did you include any new assets either in the supplemental material or as a URL? [No]  
461 We will only open-source the code later (not before, in order not to break anonymity  
462 of the submission).  
463 (d) Did you discuss whether and how consent was obtained from people whose data  
464 you're using/curating? [N/A]  
465 (e) Did you discuss whether the data you are using/curating contains personally identifi-  
466 able information or offensive content? [N/A] These are numerical time series in an  
467 aggregated fashion so this does not apply.
5. If you used crowdsourcing or conducted research with human subjects...  
468  
469 (a) Did you include the full text of instructions given to participants and screenshots, if  
470 applicable? [N/A]  
471 (b) Did you describe any potential participant risks, with links to Institutional Review  
472 Board (IRB) approvals, if applicable? [N/A]  
473 (c) Did you include the estimated hourly wage paid to participants and the total amount  
474 spent on participant compensation? [N/A]

475 **A Additional Experiment Details & Results**

476 Here we provide further details of our experimental set up, report additional results evaluating our  
 477 method against two more baselines and using one more evaluation metric that measures error for  
 478 point forecasts.

479 All the deep learning based methods are run using Amazon SageMaker [22] on a machine with  
 480 3.4GHz processor and 32GB RAM. The remaining methods (R-based) are run on Amazon cloud  
 481 instance of same configuration, 3.4GHz processor and 32GB RAM.

482 Detailed information about datasets and how to download them is already provided in the main text;  
 483 see Section 5. Moreover, details of hyper-parameters and their tuning is also provided in the exper-  
 484 iments section. We used the code available in `GLuonTS` forecasting library to run all the baseline  
 485 methods compared. Note that our method `DeepNPTS` generates multiple training instances for each  
 486 time series as explained in Section 3 (see “Data Augmentation” paragraph). We use `GLuonTS` for  
 487 this purpose and fix the length of the context window large enough such that the required number  
 488 of training instances can be generated. So we fix the context length depending on the history of the  
 489 time series available, more importantly, without tuning. Table 6 shows the context lengths (as factor  
 490 of prediction lengths) used for different datasets.

| dataset        | context Length   |
|----------------|------------------|
| M4 daily       | 14× pred. length |
| M4 hourly      | 10× pred. length |
| M4 monthly     | 2× pred. length  |
| M4 quarterly   | 2× pred. length  |
| M4 yearly      | 1× pred. length  |
| Wiki           | 10× pred. length |
| Other datasets | 28× pred. length |

Table 6: Context lengths used for `DeepNPTS`.

491 **A.1 Quantitative Results**

492 In addition to the standard baselines used in the main version of the paper, here we include compar-  
 493 isons against `TBATS` [24] and `Theta` [3] methods. `TBATS` incorporates Box-Cox transformation and  
 494 Fourier representations in the state space framework to handle complex seasonal time series thereby  
 495 addressing the limitations of `ETS` and `ARIMA`. `Theta` forecasting method is an additional baseline  
 496 with good empirical performance [3] and its forecasts are equivalent to simple exponential smoothing  
 497 model with drift [17]. The mean quantile losses for all the methods is shown in Tables 7 and  
 498 8.

| dataset estimator            | Electricity          | Exchange Rate        | Solar Energy         | Taxi                 | Traffic              | Wiki                 |
|------------------------------|----------------------|----------------------|----------------------|----------------------|----------------------|----------------------|
| <code>Seas.Naive</code>      | 0.070+/-0.000        | 0.011+/-0.000        | 0.605+/-0.000        | 0.507+/-0.000        | 0.251+/-0.000        | 0.404+/-0.000        |
| <code>AutoETS</code>         | 0.118+/-0.001        | <b>0.007+/-0.000</b> | 1.717+/-0.005        | 0.572+/-0.000        | 0.359+/-0.000        | 0.664+/-0.001        |
| <code>AutoARIMA</code>       | -                    | 0.008+/-0.000        | 1.161+/-0.001        | 0.473+/-0.000        | -                    | 0.477+/-0.000        |
| <code>Theta</code>           | 0.105+/-0.000        | <b>0.007+/-0.000</b> | 1.083+/-0.000        | 0.558+/-0.000        | 0.331+/-0.000        | 0.622+/-0.000        |
| <code>TBATS</code>           | -                    | 0.008+/-0.000        | 0.876+/-0.000        | -                    | -                    | 0.495+/-0.000        |
| <code>DeepAR</code>          | <b>0.056+/-0.001</b> | 0.009+/-0.001        | <b>0.426+/-0.004</b> | <b>0.289+/-0.001</b> | <b>0.117+/-0.001</b> | <b>0.226+/-0.002</b> |
| <code>NPTS(uni.)</code>      | 0.230+/-0.001        | 0.026+/-0.000        | 0.805+/-0.001        | 0.473+/-0.000        | 0.403+/-0.000        | 0.291+/-0.000        |
| <code>Seas.NPTS(uni.)</code> | 0.061+/-0.000        | 0.026+/-0.000        | 0.791+/-0.000        | 0.474+/-0.000        | 0.174+/-0.000        | 0.285+/-0.000        |
| <code>NPTS</code>            | 0.230+/-0.001        | 0.021+/-0.000        | 0.802+/-0.001        | 0.473+/-0.000        | 0.403+/-0.000        | 0.277+/-0.000        |
| <code>Seas.NPTS</code>       | 0.060+/-0.000        | 0.020+/-0.000        | 0.790+/-0.000        | 0.474+/-0.000        | 0.173+/-0.000        | 0.269+/-0.000        |
| <code>DeepNPTS</code>        | <b>0.059+/-0.004</b> | 0.009+/-0.000        | <b>0.447+/-0.011</b> | <b>0.413+/-0.015</b> | <b>0.163+/-0.036</b> | <b>0.232+/-0.000</b> |

Table 7: Mean quantile losses averaged over 5 runs (lower is better). Best two methods are high-  
 lighted. The bottom half shows different variants of the `NPTS` method. `AutoARIMA` and `TBATS`  
 exceeded the time limit of 24 hours for `Electricity` and `Traffic` datasets, so we do not report  
 their numbers.

499 Additionally, to evaluate mean forecasts, we report the (normalized) root-mean squared errors  
 500 (RMSE) for all the methods. Note that unlike mean quantile loss which evaluates the spread of

| dataset         | M4 daily             | M4 hourly            | M4 monthly           | M4 quarterly         | M4 weekly            | M4 yearly            |
|-----------------|----------------------|----------------------|----------------------|----------------------|----------------------|----------------------|
| Seas.Naive      | 0.028+/-0.000        | 0.048+/-0.000        | 0.146+/-0.000        | 0.119+/-0.000        | 0.063+/-0.000        | 0.162+/-0.000        |
| AutoETS         | <b>0.022+/-0.000</b> | 0.042+/-0.001        | 0.096+/-0.000        | <b>0.076+/-0.000</b> | 0.049+/-0.000        | 0.122+/-0.000        |
| AutoARIMA       | 0.024+/-0.000        | 0.038+/-0.001        | <b>0.094+/-0.000</b> | 0.077+/-0.000        | <b>0.048+/-0.000</b> | <b>0.120+/-0.000</b> |
| Theta           | 0.023+/-0.000        | <b>0.041+/-0.000</b> | <b>0.094+/-0.000</b> | 0.077+/-0.000        | 0.050+/-0.000        | <b>0.116+/-0.000</b> |
| TBATS           | <b>0.021+/-0.000</b> | <b>0.031+/-0.000</b> | -                    | <b>0.074+/-0.000</b> | <b>0.046+/-0.000</b> | 0.123+/-0.000        |
| DeepAR          | <b>0.022+/-0.000</b> | 0.050+/-0.003        | 0.112+/-0.002        | 0.086+/-0.004        | 0.051+/-0.004        | 0.130+/-0.007        |
| NPTS(uni.)      | 0.161+/-0.000        | 0.115+/-0.001        | 0.257+/-0.000        | 0.289+/-0.000        | 0.319+/-0.001        | 0.389+/-0.000        |
| Seas.NPTS(uni.) | 0.161+/-0.000        | 0.053+/-0.000        | 0.258+/-0.000        | 0.288+/-0.000        | 0.329+/-0.001        | 0.389+/-0.000        |
| NPTS            | 0.139+/-0.000        | 0.112+/-0.001        | 0.224+/-0.000        | 0.246+/-0.000        | 0.272+/-0.000        | 0.343+/-0.000        |
| Seas.NPTS       | 0.139+/-0.000        | 0.046+/-0.000        | 0.225+/-0.000        | 0.245+/-0.000        | 0.285+/-0.000        | 0.343+/-0.000        |
| DeepNPTS        | 0.027+/-0.000        | 0.065+/-0.019        | 0.149+/-0.012        | 0.097+/-0.002        | 0.057+/-0.001        | 0.168+/-0.008        |

Table 8: Mean quantile losses averaged over 5 runs (lower is better) for M4 datasets. Best two methods are highlighted. The bottom half shows different variants of the NPTS method. TBATS exceeded the time limit of 24 hours for M4 monthly dataset, so we do not report that number.

501 the forecast distribution, RMSE is a metric for point forecast and measures the error between the  
502 mean forecast  $\hat{z}$  and the actual observation  $z$ . RMSE for a given dataset of  $N$  time series and  $T$   
503 evaluation points is given by

$$\text{RMSE} = \sqrt{\frac{1}{NT} \sum_{i=1}^N \sum_{t=1}^T (z_{i,t} - \hat{z}_{i,t})^2}.$$

504 Since RMSE is a scale-dependent error, we normalize it by the total actual values for better read-  
505 ability. The normalized RMSE is given by

$$\text{NRMSE} = \frac{1}{\sum_{i=1}^N \sum_{t=1}^T |z_{it}|} \text{RMSE}.$$

506 The NRMSE scores are shown in Tables 9 and 10. Again, similar to the mean quantile loss,  
507 DeepNPTS consistently achieves good normalized RMSE values across the datasets and stands as  
508 one of top two methods for 4 out of 12 datasets.

| dataset estimator | Electricity          | Exchange Rate        | Solar Energy         | Taxi                 | Traffic              | Wiki                 |
|-------------------|----------------------|----------------------|----------------------|----------------------|----------------------|----------------------|
| Seas.Naive        | <b>0.478+/-0.000</b> | 0.016+/-0.000        | 1.368+/-0.000        | <b>0.807+/-0.000</b> | 0.613+/-0.000        | 3.052+/-0.000        |
| AutoETS           | 1.393+/-0.023        | <b>0.014+/-0.000</b> | 2.153+/-0.016        | 1.198+/-0.001        | 0.646+/-0.002        | 6.025+/-0.053        |
| AutoARIMA         | -                    | <b>0.014+/-0.000</b> | 1.974+/-0.002        | 0.969+/-0.001        | -                    | 3.059+/-0.004        |
| Theta             | 0.812+/-0.000        | <b>0.014+/-0.000</b> | 2.030+/-0.000        | 1.161+/-0.000        | 0.636+/-0.000        | 2.797+/-0.000        |
| TBATS             | -                    | <b>0.014+/-0.000</b> | 1.642+/-0.000        | -                    | -                    | 5.761+/-0.000        |
| DeepAR            | <b>0.711+/-0.034</b> | 0.020+/-0.002        | <b>1.119+/-0.005</b> | <b>0.603+/-0.002</b> | <b>0.406+/-0.003</b> | <b>2.123+/-0.006</b> |
| NPTS(uni.)        | 2.742+/-0.023        | 0.050+/-0.000        | 1.744+/-0.001        | 0.944+/-0.000        | 0.834+/-0.000        | 2.243+/-0.002        |
| Seas.NPTS(uni.)   | 0.739+/-0.003        | 0.050+/-0.000        | 1.739+/-0.001        | 0.944+/-0.000        | 0.521+/-0.001        | 2.276+/-0.004        |
| NPTS              | 2.752+/-0.013        | 0.041+/-0.000        | 1.740+/-0.002        | 0.944+/-0.000        | 0.834+/-0.000        | 2.229+/-0.003        |
| Seas.NPTS         | 0.727+/-0.004        | 0.041+/-0.000        | 1.737+/-0.001        | 0.944+/-0.000        | 0.520+/-0.000        | 2.265+/-0.008        |
| DeepNPTS          | 0.713+/-0.087        | <b>0.014+/-0.000</b> | <b>1.217+/-0.025</b> | 0.821+/-0.020        | <b>0.490+/-0.066</b> | <b>2.180+/-0.000</b> |

Table 9: Normalized RMSE values averaged over 5 runs (lower is better). Best two methods are highlighted. The bottom half shows different variants of the NPTS method. AutoARIMA and TBATS exceeded the time limit of 24 hours for Electricity and Traffic datasets, so we do not report their numbers.

## 509 A.2 Data Visualization

510 To illustrate the diversity of the datasets used, we plot the distribution of observed values in the  
511 training part of the time series marginalized over time and item dimensions (each dataset contains  
512 time series corresponding to different *items*). The plot is shown in Figure 3 for all the datasets.

| dataset         | M4 daily             | M4 hourly            | M4 monthly           | M4 quarterly         | M4 weekly            | M4 yearly            |
|-----------------|----------------------|----------------------|----------------------|----------------------|----------------------|----------------------|
| Seas.Naive      | 0.109+/-0.000        | 0.260+/-0.000        | 0.339+/-0.000        | 0.264+/-0.000        | 0.123+/-0.000        | 0.324+/-0.000        |
| AutoETS         | <b>0.093+/-0.001</b> | 0.293+/-0.006        | 0.294+/-0.000        | <b>0.230+/-0.000</b> | 0.119+/-0.000        | 0.332+/-0.000        |
| AutoARIMA       | 0.099+/-0.000        | 0.307+/-0.010        | <b>0.288+/-0.000</b> | 0.240+/-0.001        | <b>0.117+/-0.001</b> | 0.331+/-0.000        |
| Theta           | 0.097+/-0.000        | <b>0.259+/-0.000</b> | <b>0.287+/-0.000</b> | <b>0.225+/-0.000</b> | 0.121+/-0.000        | <b>0.301+/-0.000</b> |
| TBATS           | <b>0.095+/-0.000</b> | <b>0.210+/-0.000</b> | -                    | 0.239+/-0.000        | <b>0.118+/-0.000</b> | 0.417+/-0.000        |
| DeepAR          | 0.102+/-0.002        | 0.487+/-0.034        | 0.292+/-0.004        | 0.239+/-0.003        | 0.121+/-0.004        | <b>0.302+/-0.005</b> |
| NPTS(uni.)      | 0.374+/-0.000        | 0.982+/-0.009        | 0.593+/-0.000        | 0.605+/-0.000        | 0.721+/-0.001        | 0.730+/-0.000        |
| Seas.NPTS(uni.) | 0.374+/-0.000        | 0.448+/-0.003        | 0.592+/-0.000        | 0.603+/-0.000        | 0.728+/-0.001        | 0.730+/-0.000        |
| NPTS            | 0.340+/-0.000        | 0.957+/-0.004        | 0.544+/-0.000        | 0.546+/-0.000        | 0.647+/-0.001        | 0.675+/-0.000        |
| Seas.NPTS       | 0.341+/-0.000        | 0.387+/-0.002        | 0.543+/-0.000        | 0.544+/-0.000        | 0.658+/-0.001        | 0.676+/-0.000        |
| DeepNPTS        | 0.102+/-0.001        | 0.541+/-0.161        | 0.353+/-0.019        | 0.245+/-0.005        | 0.127+/-0.002        | 0.362+/-0.014        |

Table 10: Normalized RMSE values averaged over 5 runs (lower is better) for M4 datasets. Best two methods are highlighted. The bottom half shows different variants of the NPTS method. TBATS exceeded the time limit of 24 hours for M4 monthly dataset, so we do not report that number.

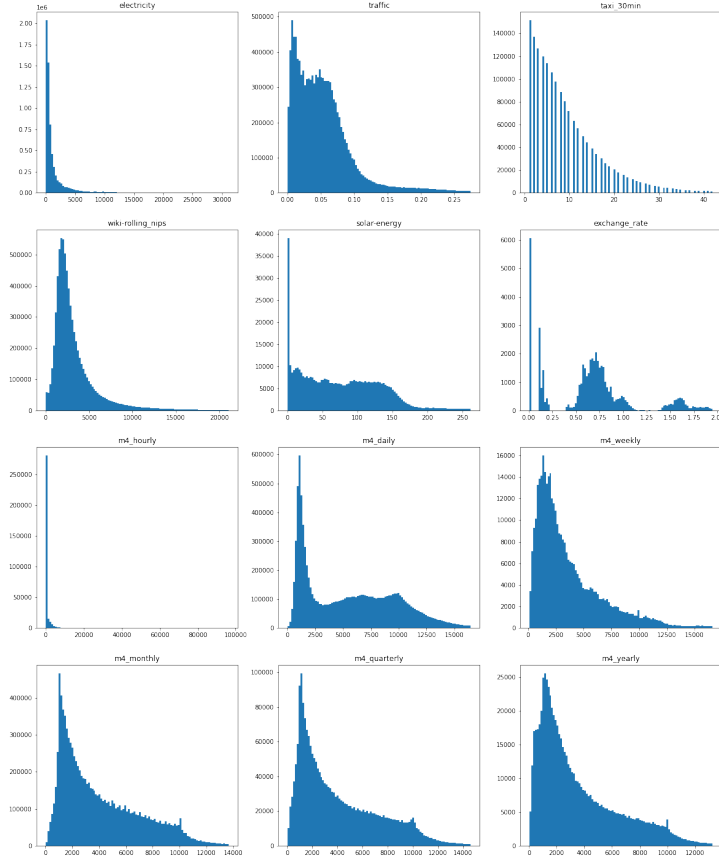

Figure 3: Histogram of observed values of the (training part of) time series for all datasets used in the evaluations.
